# Supplementary material
Source: PubMed Central journal article supplement (PMC9171407)

5A KLF10

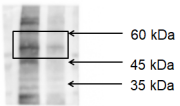

5A  $\beta$ -actinn

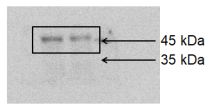

5B strep

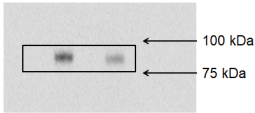

5B CD36

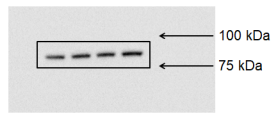

5C CD36

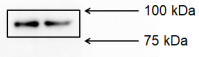

5C ATP1a1

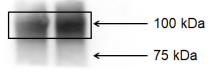

5D KLF10

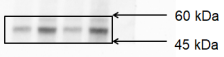

5D  $\beta$ -actin

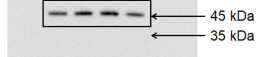

5E strep

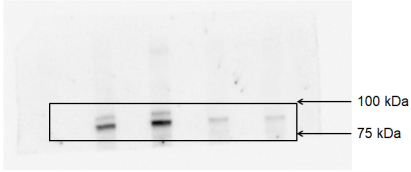

5E CD36

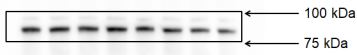

5F CD36

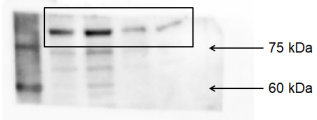

5F ATP1a1

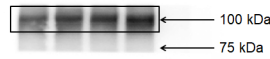

5H KLF10

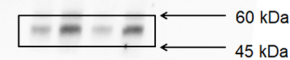

5H zDHHC7

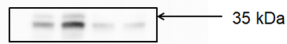

5H  $\beta$ -actin

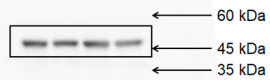

5I strep

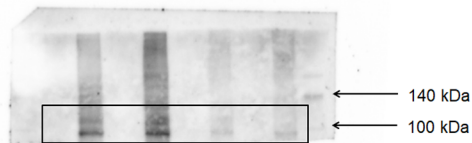

5I CD36

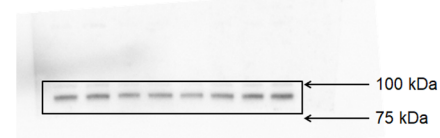

Supplement: EMBR-23-e54229-s009.pdf [file EMBR-23-e54229-s009.pdf]
