# Supplementary material
Source: PubMed Central journal article supplement (PMC9171407)

1C KLF10

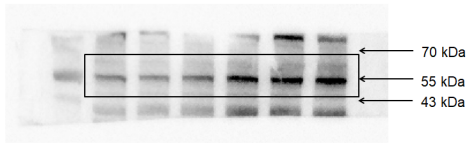

1C  $\beta$ -actin

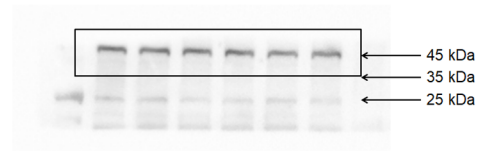

Supplement: EMBR-23-e54229-s001.pdf [file EMBR-23-e54229-s001.pdf]

7H strep

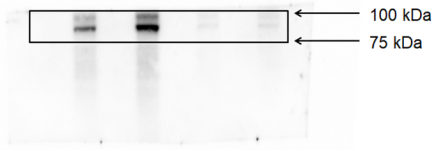

7H CD36

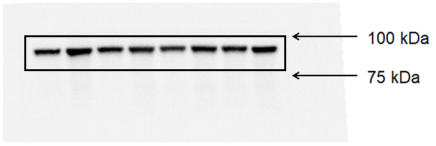

7I CD36

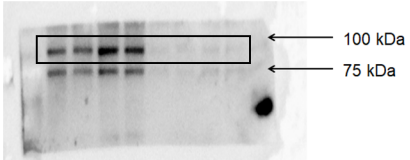

7I ATP1a1

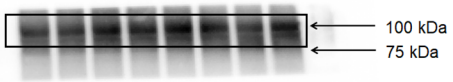

Supplement: EMBR-23-e54229-s002.pdf [file EMBR-23-e54229-s002.pdf]

6A KLF10

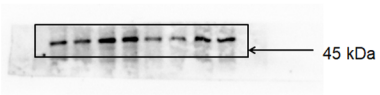

6A CD36

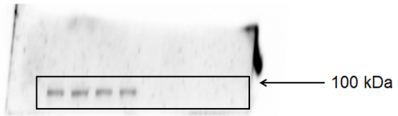

6A  $\beta$ -actin

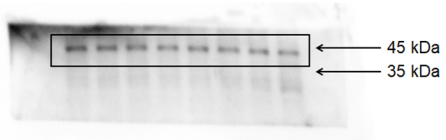

Supplement: EMBR-23-e54229-s004.pdf [file EMBR-23-e54229-s004.pdf]

4C CD36

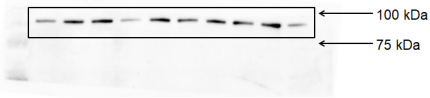

4C  $\beta$ -actin

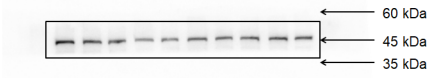

4C CD36

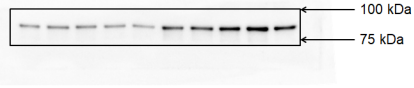

4C ATP1a1

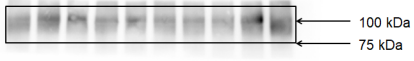

4D strep

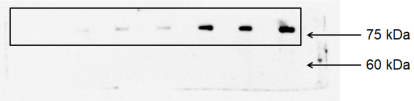

4D CD36

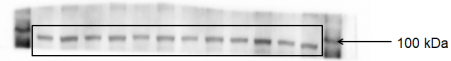

4H CD36

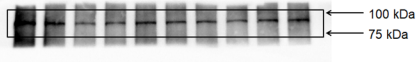

4H  $\beta$ -actin

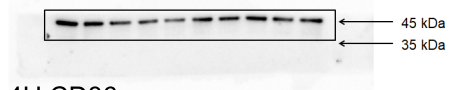

4H CD36

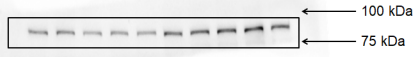

4H ATP1a1

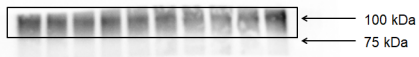

4I strep

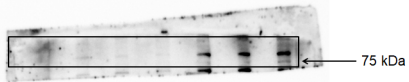

4I CD36

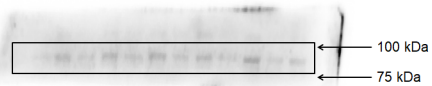

Supplement: EMBR-23-e54229-s005.pdf [file EMBR-23-e54229-s005.pdf]

3B KLF10

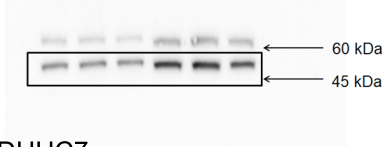

3B zDHHC7

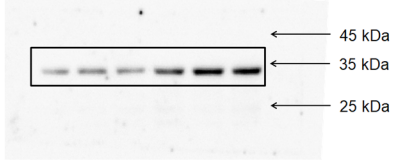

3B  $\beta$ -actin

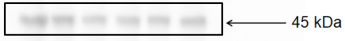

3F zDHHC7

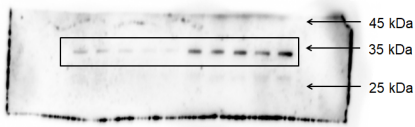

3F  $\beta$ -actin

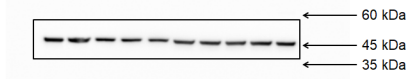

3F zDHHC7

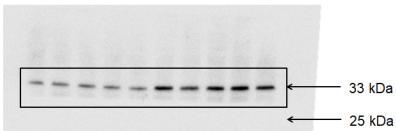

3F  $\beta$ -actin

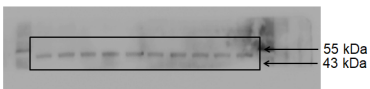

Supplement: EMBR-23-e54229-s008.pdf [file EMBR-23-e54229-s008.pdf]

2B KLF10

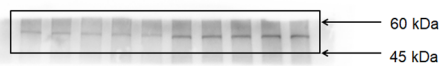

2B  $\beta$ -actin

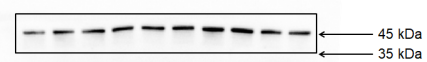

2H TNF- $\alpha$

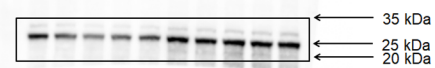

2H  $\beta$ -actin

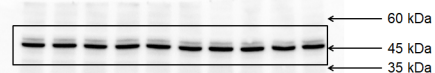

2J KLF10

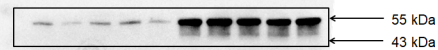

2J  $\beta$ -actin

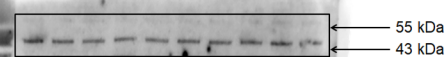

2P TNF- $\alpha$

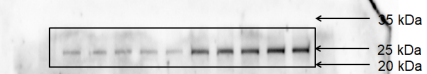

2P  $\beta$ -actin

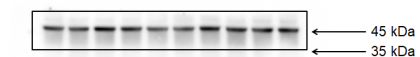

Supplement: EMBR-23-e54229-s014.pdf [file EMBR-23-e54229-s014.pdf]

8A KLF10

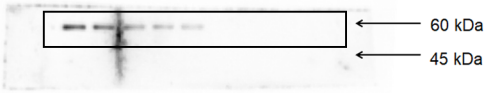

8A zDHHC7

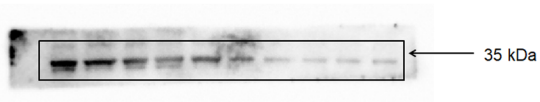

8A TNF-a

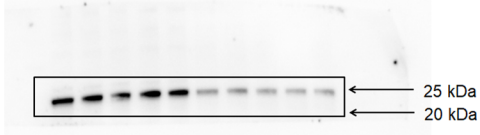

8A  $\beta$ -actin

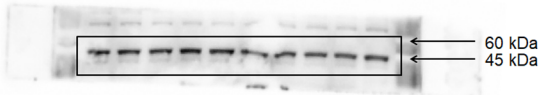

8K strep

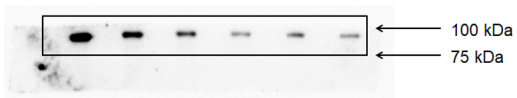

8K CD36

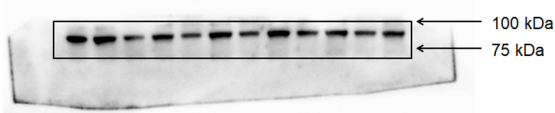

8L CD36

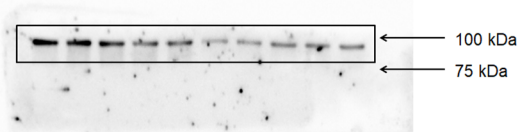

8L ATP1a1

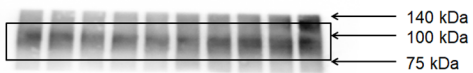

Supplement: EMBR-23-e54229-s015.pdf [file EMBR-23-e54229-s015.pdf]
